# Supplementary material
Source: PubMed Central journal article supplement (PMC5026971)
Supplement: NIHMS809013-supplement-1.pdf [file NIHMS809013-supplement-1.pdf]

**Supplemental Table 1: Antibody list for flow cytometry data****Cytokine frequency panel**

| <b>Name</b>              | <b>Color</b>                 | <b>Clone</b> | <b>Company</b>   |
|--------------------------|------------------------------|--------------|------------------|
| Fixable blue Live/Dead   | UV450                        | -            | Molecular Probes |
| Anti-human CD3           | APC-H7                       | SK7          | BD Pharmingen    |
| Anti-human CD4           | Qdot-605                     | S3.5         | Molecular Probes |
| Anti-human CD8           | V500                         | RPA-T8       | BD Horizon       |
| Anti-human IL-4          | FITC                         | MP4-25D2     | BD Pharmingen    |
| Anti-human IFN- $\gamma$ | PE-Cy7                       | 4S.B3        | BD Pharmingen    |
| Anti-human IL-10         | eFluor <sup>®</sup> 450      | JES3-9D7     | eBioscience      |
| Anti-human IL-17A        | PerCP-Cy5.5                  | N49-653      | BD Pharmingen    |
| Anti-human IL-5          | PE                           | TRFK5        | BD Pharmingen    |
| Anti-human IL-2          | PE-CF594                     | 5344.111     | BD Pharmingen    |
| Anti-human TNF- $\alpha$ | Alexa Fluor <sup>®</sup> 700 | MAb11        | BD Pharmingen    |

**Surface markers panel**

|                        |                              |        |                  |
|------------------------|------------------------------|--------|------------------|
| Fixable blue Live/Dead | UV450                        | -      | Molecular Probes |
| Anti-human CD3         | Alexa Fluor <sup>®</sup> 700 | UCHT1  | BD Pharmingen    |
| Anti-human CD4         | V500                         | RPA-T4 | BD Horizon       |
| Anti-human CD25        | PE-Cy7                       | BC96   | eBioscience      |

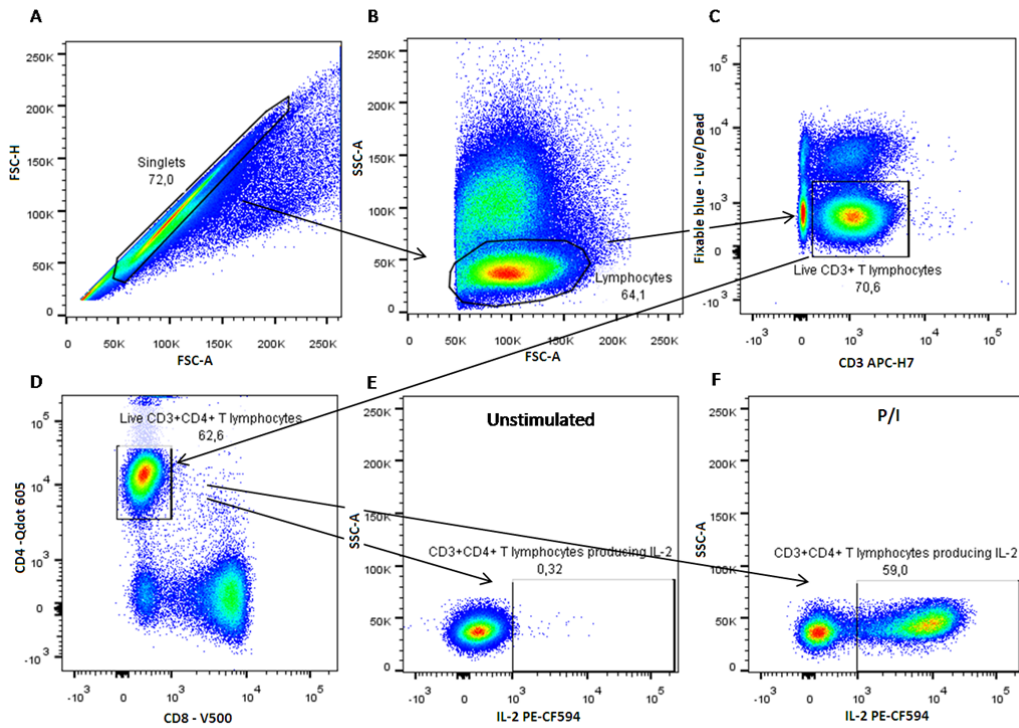

**Supplemental Figure 1. Representative gating strategy for CD4<sup>+</sup> T cells producing cytokines.** Initial gating of single cells (A), followed by the lymphocytes based on forward- and side-scatter properties (B). Live T cells (Fixable blue<sup>-</sup> and CD3<sup>+</sup> T cells) (C). Cytokine-positive CD4<sup>+</sup> T cells were gated as shown and the responding frequencies were determined based on unstimulated and stimulated conditions (D,E and F).

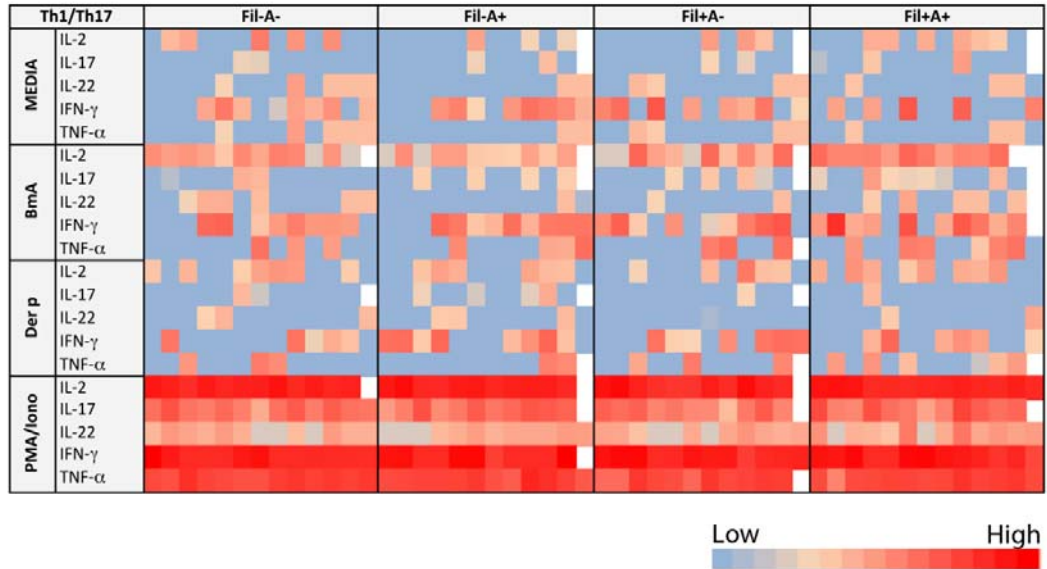

**Supplemental Figure 2. Th1/Th17-associated cytokines driven by parasite antigens, allergens and mitogen in the filarial-infected individuals with or without coincident allergic sensitization.** Heat map representing the range of reactivity (from low in light blue to high in dark red) of Th1- and Th17-associated cytokines (IL-2, IL-17, IL-22 and IFN- $\gamma$  TNF- $\alpha$ ) of patients from the 4 groups (in the columns) at the baseline (MEDIA) and stimulated by filarial antigen (BMA), Der p and P/I.

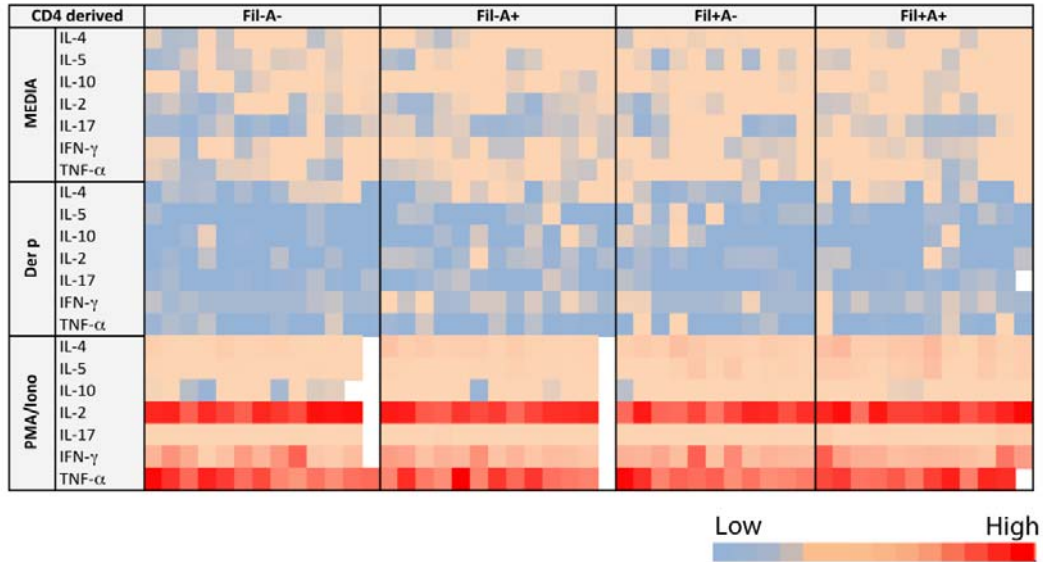

**Supplemental Figure 3. Allergen and mitogen-specific CD4<sup>+</sup> T-cells responsiveness in the filarial-infected individuals with or without coincident allergic sensitization.**

Heat map representing the range of frequency (from low in light blue to high in dark red) of CD4<sup>+</sup> T lymphocytes from the 4 groups (in the columns), producing IL-4, IL-5, IL-10, IL-2, IL-17A, IFN- $\gamma$  and TNF- $\alpha$ , at baseline (MEDIA and following stimulation by Der p and P/I).
